# Supplementary material for: Psychometric Evaluation of the Food Life Questionnaire—Short Form among Brazilian Adult Women
Source: MDPI journal article supplement (doi:10.3390/nu16070927), 2024-03-23
Supplement: s1 [file s1]

## Supplementary Materials

**Table S1.** Evaluation of verbal comprehension and content validity of the Brazilian Portuguese version of the Food Life Questionnaire-Short Form (FLQ-SF).

| FLQ-SF items / <i>Brazilian Portuguese translation</i>                                                                                                                                                                                     | Verbal Comprehension<br><i>Md (Min-Max)</i> | CVI         |
|--------------------------------------------------------------------------------------------------------------------------------------------------------------------------------------------------------------------------------------------|---------------------------------------------|-------------|
| 1 - I am concerned about being overweight. / <i>Eu me preocupo em estar acima do peso.</i>                                                                                                                                                 | 5 (2-5)                                     | 1           |
| 2 - I feel guilty when I overeat. / <i>Eu me sinto culpado(a) quando como em excesso.</i>                                                                                                                                                  | 5 (2-5)                                     | 1           |
| 3 - My thighs are too fat. / <i>Minhas coxas são muito gordas.</i>                                                                                                                                                                         | 5 (0-5)                                     | 1           |
| 4 - I consciously hold back at meal time, so as not to gain weight. / <i>Eu conscientemente me seguro na hora das refeições para não ganhar peso.</i>                                                                                      | 5 (0-5)                                     | 1           |
| 5 - I am currently on a diet. / <i>Atualmente, eu estou fazendo dieta.</i>                                                                                                                                                                 | 5 (0-5)                                     | 1           |
| 6 - I control my caloric intake. / <i>Eu controlo meu consumo de calorias.</i>                                                                                                                                                             | 5 (0-5)                                     | 1           |
| 7 - I am a healthy eater. / <i>Eu como de forma saudável.</i>                                                                                                                                                                              | 5 (0-5)                                     | 1           |
| 8 - I eat fast food on a regular basis. / <i>Eu como fast food regularmente.</i>                                                                                                                                                           | 5 (0-5)                                     | 1           |
| 9 - Taste is more important to me than nutrition. / <i>Para mim, o sabor é mais importante do que a nutrição.</i>                                                                                                                          | 5 (0-5)                                     | 1           |
| 10 - I eat low-fat food on a regular basis. / <i>Eu como alimentos com baixo teor de gordura regularmente.</i>                                                                                                                             | 5 (1-5)                                     | 1           |
| 11 - I rarely think about the long-term effects of my diet on health. / <i>Eu raramente penso sobre os efeitos em longo prazo que minha dieta terá em minha saúde.</i>                                                                     | 5 (0-5)                                     | 1           |
| 12 - Diet can have a big effect on good health. / <i>A dieta pode ter um grande efeito em uma boa saúde.</i>                                                                                                                               | 5 (2-5)                                     | 1           |
| 13 - Diet can have a big effect on heart disease. / <i>A dieta pode ter um grande efeito em doenças do coração.</i>                                                                                                                        | 5 (2-5)                                     | 1           |
| 14 - Diet can have a big effect on obesity. / <i>A dieta pode ter um grande efeito na obesidade.</i>                                                                                                                                       | 5 (2-5)                                     | 1           |
| 15 - Diet can have a big effect on cancer. / <i>A dieta pode ter um grande efeito no câncer.</i>                                                                                                                                           | 5 (1-5)                                     | 1           |
| 16 - Enjoying food is one of the most important pleasures in my life. / <i>Desfrutar da comida é um dos prazeres mais importantes da minha vida.</i>                                                                                       | 5 (1-5)                                     | 1           |
| 17 - I have fond memories of family food occasions. / <i>Eu tenho boas lembranças de família em ocasiões envolvendo comida.</i>                                                                                                            | 5 (2-5)                                     | 1           |
| 18 - Money spent on food is well spent. / <i>Dinheiro gasto em comida é um dinheiro bem gasto.</i>                                                                                                                                         | 5 (2-5)                                     | 1           |
| 19 - I think about food in a positive way. / <i>Eu penso em comida de uma forma positiva.</i>                                                                                                                                              | 5 (2-5)                                     | 1           |
| 20 - I think natural, organic foods are better for you than commercially grown/processed foods. / <i>Eu penso que comidas naturais, orgânicas, são melhores para você do que comidas industrializadas/processadas.</i>                     | 5 (0-5)                                     | 1           |
| 21 - I think natural, organic foods taste better than commercially grown/processed foods. / <i>Eu penso que comidas naturais, orgânicas, são mais gostosas do que comidas industrializadas/processadas.</i>                                | 5 (0-5)                                     | 1           |
| 22 - I would rather be friends with someone who eats lots of fruits and vegetables than someone who eats lots of meats. / <i>Eu prefiro ser amigo(a) de alguém que come muitas frutas e vegetais do que alguém que come muitas carnes.</i> | 4 (0-5)                                     | 0           |
| <b>Total</b>                                                                                                                                                                                                                               | <b>4 (2-5)</b>                              | <b>0.95</b> |

Note: *Md* = median; *Min* = minimum; *Max* = maximum; *CVI* = Content Validity Index.

**Figure S1.** Scree plot derived from parallel analysis of EFA ( $n = 289$ ).

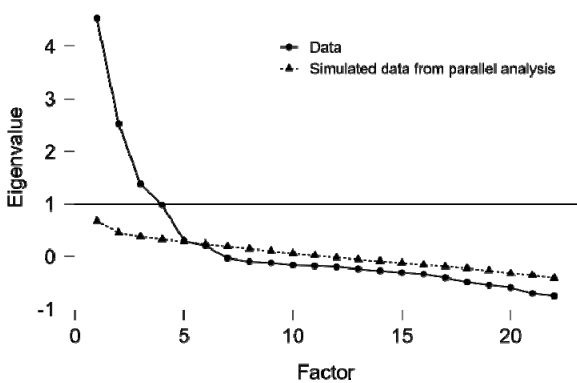

**Table S2.** Confirmatory factor analysis and standardized factor loadings of the re-specified model of the Food Life Questionnaire-Short Form (FLQ-SF).

| Subscales | Item  | Non-Standardized $\lambda$ | SE    | z-value | p      | 95% CI |       | Standardized $\lambda$ |
|-----------|-------|----------------------------|-------|---------|--------|--------|-------|------------------------|
|           |       |                            |       |         |        | Lower  | Upper |                        |
| WC        | FLQ1  | 1.250                      | 0.173 | 7.226   | < .001 | 0.911  | 1.589 | 0.648                  |
|           | FLQ2  | 1.435                      | 0.183 | 7.825   | < .001 | 1.075  | 1.794 | 0.712                  |
|           | FLQ3  | 1.285                      | 0.223 | 5.758   | < .001 | 0.848  | 1.722 | 0.572                  |
|           | FLQ4  | 1.228                      | 0.155 | 7.935   | < .001 | 0.925  | 1.531 | 0.661                  |
|           | FLQ5  | 0.655                      | 0.048 | 13.657  | < .001 | 0.561  | 0.748 | 0.655                  |
|           | FLQ6  | 1.140                      | 0.173 | 6.600   | < .001 | 0.802  | 1.479 | 0.562                  |
| DHO       | FLQ7  | 1.159                      | 0.181 | 6.392   | < .001 | 0.804  | 1.515 | 0.650                  |
|           | FLQ21 | 1.146                      | 0.190 | 6.048   | < .001 | 0.775  | 1.518 | 0.607                  |
| DHL       | FLQ12 | 0.849                      | 0.058 | 14.663  | < .001 | 0.736  | 0.963 | 0.691                  |
|           | FLQ13 | 1.196                      | 0.069 | 17.442  | < .001 | 1.061  | 1.330 | 0.867                  |
|           | FLQ14 | 1.109                      | 0.059 | 18.805  | < .001 | 0.993  | 1.225 | 0.840                  |
|           | FLQ15 | 1.193                      | 0.065 | 18.497  | < .001 | 1.067  | 1.320 | 0.850                  |
|           | FLQ20 | 0.785                      | 0.068 | 11.595  | < .001 | 0.653  | 0.918 | 0.603                  |
| FP        | FLQ16 | 1.100                      | 0.119 | 9.226   | < .001 | 0.866  | 1.333 | 0.636                  |
|           | FLQ17 | 1.103                      | 0.090 | 12.307  | < .001 | 0.928  | 1.279 | 0.743                  |
|           | FLQ18 | 0.941                      | 0.082 | 11.470  | < .001 | 0.780  | 1.102 | 0.655                  |
|           | FLQ19 | 1.062                      | 0.087 | 12.170  | < .001 | 0.891  | 1.233 | 0.731                  |

Note:  $n = 315$ ;  $\lambda$  = factor loadings;  $SE$  = standard error; CI = confidence interval; WC = weight concern subscale; DHO = diet-health orientation subscale; DHL = diet-health link subscale; FP = pleasure and food subscale.
